# Supplementary material for: Genome- and Proteome-Wide Analysis of Lysine Acetylation in Vibrio vulnificus Vv180806 Reveals Its Regulatory Roles in Virulence and Antibiotic Resistance
Source: Front Microbiol. 2020 Nov 5;11:591287. doi: 10.3389/fmicb.2020.591287 (PMC7674927; doi:10.3389/fmicb.2020.591287)
Supplement: Supplementary file 6 [file Table_6.XLSX]

## Sheet: motif-x
	Table S6. The statistical result of motif-x output.
	Motif Logo				Motif	Motif Score	Foreground		Background		Fold Increase
							Matches	Size	Matches	Size
					xxxxxxxxxx_K_Hxxxxxxxxx	16.00	361	6625	1777	71270	2.2
					xxxxxxxxxx_K_Fxxxxxxxxx	16.00	318	6264	2105	69493	1.7
					xxxxxxxxxx_K_Yxxxxxxxxx	14.98	283	5946	1938	67388	1.7
					xxxxxxxxxx_K_Sxxxxxxxxx	12.72	501	5663	4160	65450	1.4
					xKxxxxxxxx_K_xxxxxxxxxx	10.55	385	5162	3243	61290	1.4
					xxxxRxxxxx_K_xxxxxxxxxx	9.78	327	4777	2774	58047	1.4
					xxKxxxxxxx_K_xxxxxxxxxx	11.20	362	4450	3117	55273	1.4
					xxRxxxxxxx_K_xxxxxxxxxx	10.64	301	4088	2590	52156	1.5
					xxxKxxxxxx_K_xxxxxxxxxx	11.47	322	3787	2839	49566	1.5
					xxxxxRxxxx_K_xxxxxxxxxx	11.71	256	3465	2190	46727	1.6
					xxxRxxxxxx_K_xxxxxxxxxx	11.96	260	3209	2288	44537	1.6
					xxxxKxxxxx_K_xxxxxxxxxx	10.24	243	2949	2263	42249	1.5
					Rxxxxxxxxx_K_xxxxxxxxxx	11.35	205	2706	1830	39986	1.7
					xxxxxKxxxx_K_xxxxxxxxxx	9.59	229	2501	2282	38156	1.5
					xxxxxxxxxx_K_Kxxxxxxxxx	12.23	216	2272	2052	35874	1.7
					xxxxxxKxxx_K_xxxxxxxxxx	10.62	193	2056	1932	33822	1.6
					xxxxxxxxxx_K_Rxxxxxxxxx	9.87	192	1863	2044	31890	1.6
					xxxxxxxxKx_K_xxxxxxxxxx	9.59	150	1671	1565	29846	1.7
					xxxxxxxRxx_K_xxxxxxxxxx	10.51	128	1521	1277	28281	1.9
					xxxxxxxKxx_K_xxxxxxxxxx	10.80	142	1393	1521	27004	1.8
					xxxxxxxxxx_K_xRxxxxxxxx	13.07	126	1251	1257	25483	2.0
					xxxxxxxxxx_K_xKxxxxxxxx	14.28	135	1125	1416	24226	2.1
					xxxxxxRxxx_K_xxxxxxxxxx	16.00	115	990	1120	22810	2.4
					xxxxxxxxxx_K_xxKxxxxxxx	11.75	104	875	1229	21690	2.1
					Kxxxxxxxxx_K_xxxxxxxxxx	9.46	87	771	1126	20461	2.1
					xRxxxxxxxx_K_xxxxxxxxxx	10.99	76	684	914	19335	2.4
					xxxxxxxxRx_K_xxxxxxxxxx	11.29	70	608	853	18421	2.5
					xxxxxxxxxx_K_xxRxxxxxxx	8.95	64	538	915	17568	2.3
					xxxxxxxxxx_K_xxxxxKxxxx	7.75	55	474	849	16653	2.3
					xxxxxxxxxx_K_xxxKxxxxxx	7.68	55	419	920	15804	2.3
					xxxxxxxxxx_K_xxxxKxxxxx	6.31	47	364	878	14884	2.2
					xxxxxxxxxx_K_xxxxRxxxxx	6.10	38	317	703	14006	2.4
